# Supplementary material
Source: publisher site journal article supplement (https://www.dovepress.com/article/339221)
Supplement: Supplementary file 1 [file get_supplementary_file.php]

**Table S1** Supplementary population analysis

|  | Survival within 30 days | Death within 30 days | *P* |
| --- | --- | --- | --- |
| N | 1,913 | 537 |  |
| Clinical parameters |  |  |  |
| Gender, n (%) |  |  | 0.009 |
| Female | 886 (46.3) | 283 (52.7) |  |
| Male | 1,027 (53.7) | 254 (47.3) |  |
| Ethnicity, n(%) |  |  | 0.015 |
| White | 1,429 (74.7) | 411 (76.5) |  |
| Black | 163 (8.5) | 26 (4.8) |  |
| Other | 321 (16.8) | 100 (18.6) |  |
| Age, years | 66.4 ± 15.7 | 74.4 ± 13.8 | <0.001 |
| Vital signs |  |  |  |
| Heart rate, beats/minute | 79.6 ± 14.7 | 84.1 ± 17.5 | <0.001 |
| SBP, mmHg | 129.2 ± 17.2 | 129.0 ± 20.2 | 0.793 |
| DBP, mmHg | 63.9 ± 11.1 | 61.8 ± 11.6 | <0.001 |
| MBP, mmHg | 83.0 ± 11.4 | 82.0 ± 12.3 | 0.083 |
| Respiratory rate, times/minute | 18.3 ± 3.5 | 19.3 ± 4.2 | <0.001 |
| Temperature, ℃ | 36.9 ± 0.6 | 37.0 ± 0.8 | <0.001 |
| SpO2, % | 97.5 ± 2.2 | 97.3 ± 3.6 | 0.201 |
| Laboratory parameters |  |  |  |
| Anion gap, mmol/l | 15.3 ± 3.4 | 16.5 ± 4.0 | <0.001 |
| Potassium, mmol/l | 4.1 ± 0.6 | 4.1 ± 0.7 | 0.178 |
| Sodium, mmol/l | 139.0 ± 4.3 | 139.0 ± 5.4 | 0.798 |
| Albumin, g/dl | 3.6 ± 0.7 | 3.4 ± 0.7 | <0.001 |
| Bicarbonate, mmol/l | 24.5 ± 4.0 | 23.4 ± 4.2 | <0.001 |
| Serum creatinine, mg/dl | 1.3 ± 1.5 | 1.4 ± 1.3 | 0.042 |
| Serum urea nitrogen, mg/dl | 23.0 ± 17.9 | 27.5 ± 19.3 | <0.001 |
| Glucose, mg/dl | 147.0 ± 62.1 | 167.0 ± 70.9 | <0.001 |
| Hematocrit, % | 36.9 ± 6.3 | 35.8 ± 6.4 | <0.001 |
| Hemoglobin, g/dl | 12.5 ± 2.2 | 12.1 ± 2.2 | <0.001 |
| SI, umol/l | 4.2 ± 7.9 | 6.8 ± 12.8 | <0.001 |
| Platelet, 109/l | 246.0 ± 106.8 | 235.7 ± 115.9 | 0.053 |
| WBC, 109/l | 11.7 ± 9.1 | 13.6 ± 15.9 | <0.001 |
| TG, mmol/l | 137.5 ± 132.3 | 128.8 ± 109.7 | 0.547 |
| TC, mmol/l | 168.8 ± 45.6 | 165.5 ± 48.6 | 0.544 |
| LDL, mmol/l | 96.1 ± 38.8 | 90.9 ± 39.3 | 0.265 |
| HDL, mmol/l | 48.8 ± 16.6 | 49.2 ± 18.4 | 0.858 |
| APTT, second | 29.8 ± 13.9 | 34.0 ± 21.5 | <0.001 |
| INR | 1.4 ± 2.0 | 1.6 ± 1.6 | 0.082 |
| PT, second | 15.0 ± 7.4 | 16.5 ± 9.9 | <0.001 |
| Comorbidities, n(%) |  |  |  |
| Congestive hearts failure | 194 (10.1) | 38 (7.1) | 0.032 |
| Atrial fibrilation | 511 (26.7) | 187 (34.8) | <0.001 |
| Liver disease | 37 (1.9) | 26 (4.8) | <0.001 |
| COPD | 20 (1.0) | 7 (1.3) | 0.613 |
| Coronary artery disease | 354 (18.5) | 90 (16.8) | 0.354 |
| Malignancy | 229 (12.0) | 75 (14.0) | 0.215 |
| Respiratory failure | 496 (25.9) | 188 (35.0) | <0.001 |
| Respiratory distress syndrome | 27 (1.4) | 8 (1.5) | 0.892 |
| Pneumonia | 399 (20.9) | 154 (28.7) | <0.001 |
| Infected | 570 (29.8) | 185 (34.5) | 0.039 |
| Cardiogenic shock | 22 (1.2) | 9 (1.7) | 0.335 |
| Coronary heart disease | 35 (1.8) | 19 (3.5) | 0.017 |
| Scoring systems |  |  |  |
| SAPSII | 34.3 ± 12.8 | 46.1 ± 13.3 | <0.001 |
| APSIII | 39.9 ± 18.9 | 53.9 ± 23.8 | <0.001 |
| Outcomes |  |  |  |
| In-hospital mortality, n (%) | 183 (9.6) | 441 (82.1) | <0.001 |
| 90-days mortality, n (%) | 122 (6.4) | 537 (100.0) | <0.001 |
| One-year mortality, n(%) | 256 (13.4) | 537 (100.0) | <0.001 |
| Hospital LOS, day | 12.8 ± 13.2 | 7.0 ± 6.4 | <0.001 |
| ICU LOS, day | 6.0 ± 7.8 | 4.6 ± 4.5 | <0.001 |
|  |  |  |  |

**Abbreviations:** SBP: systolic blood pressure; DBP: diastolic blood pressure; MAP: mean arterial pressure; SpO2: pulse oximetry-derived oxygen saturation; SI: serum iron; WBC: white blood cell count; TG: triglyceride; TC: total cholesterol; LDL: low density lipoprotein; HDL: high density lipoprotein; APTT: activated partial thromboplastin time; INR: international normalized ratio; PT: prothrombin time; COPD: chronic obstructive pulmonary disease; SAPSII: simple acute physiology score II; APSIII: acute physiology score III; SOFA: sepsis-related organ failure assessment; SIRS: systemic inflammatory response syndrome; GCS: Glasgow coma score; Hospital LOS: length of stay in hospital; ICU LOS: length of stay in intensive care unit.
